# Supplementary material for: Downregulation of miR-133a-3p promotes prostate cancer bone metastasis via activating PI3K/AKT signaling
Source: Springer Nature journal article supplement (doi:10.1186/s13046-018-0813-4), 2018-07-18
Supplement: MOESM1 [file 15961994]

**Table S1. A list of primers used in the reactions for clone PCR.**

| Gene               | Sequence (5' – 3')         |
|--------------------|----------------------------|
| miR-133a-clone-F   | TCTTTAACCATTCTAGCTTTTCCAGG |
| miR-133a-clone-R   | AAGCAAAGATGTTGAAAACAAAGACG |
| EGFR-3'UTR-1-F     | CCACGGAGGATAGTATGAGCCC     |
| EGFR-3'UTR-506-R   | AGTGGAAGCCTTGAAGCAGAAC     |
| FGFR1-3'UTR-24-F   | GACTCCACCGTCAGCTGTAAC      |
| FGFR1-3'UTR-565-R  | TTCGCCTCACCATCCTCTG        |
| IGF1R-3'UTR-2814-F | AGCTTGCCTTTTTCTGAGATGTCC   |
| IGF1R-3'UTR-3235-R | GCTGCACCTTTGTGCTCAATG      |
| MET-3'UTR-54-F     | TGCCTGACCTTTAAAAGGCCATC    |
| MET-3'UTR-554-R    | TGGCAACAGAGTGAGATCCTGTC    |
