# Supplementary material for: Downregulation of miR-133a-3p promotes prostate cancer bone metastasis via activating PI3K/AKT signaling
Source: Springer Nature journal article supplement (doi:10.1186/s13046-018-0813-4), 2018-07-18
Supplement: MOESM2 [file 15961994]

**Table S2. A list of primers used in the reactions for real-time RT-PCR.**

| Gene       | Sequence (5' – 3')        | product size (bp) |
|------------|---------------------------|-------------------|
| NANOG-F    | TCCAACATCCTGAACCTCAGCTA   | 186               |
| NANOG-R    | AGTCGGGTTCCACCAGGCATC     |                   |
| BMI-1-F    | TCGTTGTTTCGATGCATTTCT     | 90                |
| BMI-1-R    | CTTTCATTGTCTTTTCCGCC      |                   |
| SOX2-F     | GTGAGCGCCCTGCAGTACAA      | 82                |
| SOX2-R     | GCGAGTAGGACATGCTGTAGGTG   |                   |
| OCT4-F     | TGAGTAGTCCCTTCGCAAGC      | 98                |
| OCT4-R     | GAGAAGGCGAAATCCGAAG       |                   |
| EGFR-F     | GTGACCGTTTGGGAGTTGATGA    | 104               |
| EGFR-R     | GGCTGAGGGAGGCGTTCTC       |                   |
| FGFR1-F    | CCTCTATGTGGGCATGGTTT      | 128               |
| FGFR1-R    | TACAGGAAGGACGATCTGGG      |                   |
| IGF1R-F    | AGTTATCTCCGGTCTCTGAGG     | 138               |
| IGF1R-R    | TCTGTGGACGAACTTATTGGC     |                   |
| MET-F      | TTCTGACCGAGGGAATCATCA     | 82                |
| MET-R      | CCTTCACTTCGCAGGCAGAT      |                   |
| ERBB4-F    | TGCCCTACAGAGCCCCAACTA     | 105               |
| ERBB4-R    | GCTTGCGTAGGGTGCCATTAC     |                   |
| IGF2R-F    | ACCTCTGACAAGACCAAGTA      | 82                |
| IGF2R-R    | GTCTTATCCTTTCCGCACTT      |                   |
| NGFR-F     | CCTGTCTATTGCTCCATCCTG     | 126               |
| NGFR-R     | GGGCGTCTGGTTCACTG         |                   |
| INSR-F     | ACTACTCCTTCTATGCCTTG      | 128               |
| INSR-R     | GATTTCTGACAAGCAGAGTT      |                   |
| BCL2-F     | GGTGGGGTCATGTGTGTGG       | 89                |
| BCL2-R     | CGGTTCCAGGTA CT CAGTCATCC |                   |
| BCL-XL-F   | CTGCTGCATTGTTCCCATAG      | 289               |
| BCL-XL-R   | TTCAGTGACCTGACATCCCA      |                   |
| survivin-F | TCCGGTTGCGCTTTCCT         | 121               |
| survivin-R | TCTTCTTATTGTTGGTTTCCTTTGC |                   |
| MCL-1-F    | GGACATCAAAAACGAAGACG      | 154               |
| MCL-1-R    | GCAGCTTTCTTGGTTTATGG      |                   |
| GAPDH-F    | TCCTCTGACTTCAACAGCGACAC   | 126               |
| GAPDH-R    | CACCCTGTTGCTGTAGCCAAATTC  |                   |
