# Supplementary material for: Downregulation of miR-133a-3p promotes prostate cancer bone metastasis via activating PI3K/AKT signaling
Source: Springer Nature journal article supplement (doi:10.1186/s13046-018-0813-4), 2018-07-18
Supplement: MOESM3 [file 15961994]

**Table S3. The basic information of 20 paired prostate adenocarcinoma patients for miR-133a-3p expression analysis.**

|                        |             | Cases (n) | Percentage (%) |
|------------------------|-------------|-----------|----------------|
| Histologic             | Acinar Type | 20        | 100.0          |
|                        | Other       | 0         | 0.0            |
| Age                    | <62         | 9         | 45.0           |
|                        | ≥62         | 11        | 55.0           |
| T classification       | T1          | 0         | 0.0            |
|                        | T2          | 6         | 30.0           |
|                        | T3          | 14        | 70.0           |
|                        | T4          | 0         | 0.0            |
| N classification       | N0          | 15        | 75.0           |
|                        | N1          | 5         | 25.0           |
| M classification       | M0          | 19        | 95.0           |
|                        | M1          | 1         | 5.0            |
| Gleason score          | ≤6          | 1         | 5.0            |
|                        | 7           | 10        | 50.0           |
|                        | ≥8          | 9         | 45.0           |
| ISUP Grade             | 1           | 1         | 5.0            |
|                        | 2           | 6         | 30.0           |
|                        | 3           | 3         | 15.0           |
|                        | 4           | 3         | 15.0           |
|                        | 5           | 7         | 35.0           |
| Bone metastasis status | Positive    | 1         | 5.0            |
|                        | Negative    | 19        | 95.0           |

\* ISUP: International Society of Urological Pathology.
