# Supplementary material for: Downregulation of miR-133a-3p promotes prostate cancer bone metastasis via activating PI3K/AKT signaling
Source: Springer Nature journal article supplement (doi:10.1186/s13046-018-0813-4), 2018-07-18
Supplement: MOESM4 [file 15961994]

**Table S4. The basic information of 48 patients with benign prostate lesions for miR-133a-3p expression analysis.**

|                  |             | Cases (n) | Percentage (%) |
|------------------|-------------|-----------|----------------|
| Age              | <62         | 26        | 54.2           |
|                  | ≥62         | 22        | 45.8           |
| Type of diseases | Hyperplasia | 30        | 62.5           |
|                  | Prostatitis | 18        | 37.5           |

\* NA: Not available.
