# Supplementary material for: Downregulation of miR-133a-3p promotes prostate cancer bone metastasis via activating PI3K/AKT signaling
Source: Springer Nature journal article supplement (doi:10.1186/s13046-018-0813-4), 2018-07-18
Supplement: MOESM5 [file 15961994]

**Table S5. The basic information of 245 prostate adenocarcinoma patients for miR-133a-3p expression analysis.**

|                                |                 | Cases (n) | Percentage (%) |
|--------------------------------|-----------------|-----------|----------------|
| Histologic                     | Acinar Type     | 241       | 98.4           |
|                                | Other           | 4         | 1.6            |
| Age                            | <62             | 122       | 49.8           |
|                                | ≥62             | 123       | 50.2           |
| T classification               | T1              | 0         | 0.0            |
|                                | T2              | 80        | 32.7           |
|                                | T3              | 160       | 65.3           |
|                                | T4              | 5         | 2.0            |
| N classification               | N0              | 190       | 77.6           |
|                                | N1              | 55        | 22.4           |
| M classification               | M0              | 221       | 90.2           |
|                                | M1              | 24        | 9.8            |
| Gleason score                  | ≤6              | 11        | 4.5            |
|                                | 7               | 115       | 46.9           |
|                                | ≥8              | 119       | 48.6           |
| ISUP Grade                     | 1               | 11        | 4.5            |
|                                | 2               | 73        | 29.8           |
|                                | 3               | 42        | 17.1           |
|                                | 4               | 30        | 12.2           |
|                                | 5               | 89        | 36.3           |
| PSA level                      | ≤ 20ng/ml       | 201       | 82.0           |
|                                | >20 ng/ml       | 17        | 6.9            |
| Bone scan or CT or MRI results | Normal          | 13        | 5.3            |
|                                | Abnormal        | 5         | 2.0            |
|                                | Bone metastasis | 9         | 3.7            |

|                        |           |     |      |
|------------------------|-----------|-----|------|
|                        | Equivocal | 169 | 69.0 |
|                        | N/A       | 76  | 31.0 |
| The survival follow-up | Alive     | 228 | 93.1 |
|                        | Death     | 17  | 6.9  |
| The bone metastasis    | Negative  | 159 | 64.9 |
| follow-up (exclude: BM | Positive  | 64  | 26.1 |
| at first)              | N/A       | 22  | 9.0  |

---

\* ISUP: International Society of Urological Pathology, N/A: Not available, PSA: Prostate-specific antigen.

\*\* Other histologic cancers included: Duct adenocarcinoma, Squamous cell carcinoma.
