# Supplementary material for: Downregulation of miR-133a-3p promotes prostate cancer bone metastasis via activating PI3K/AKT signaling
Source: Springer Nature journal article supplement (doi:10.1186/s13046-018-0813-4), 2018-07-18
Supplement: MOESM6 [file 15961994]

**Table S6. The relationship between miR-133a-3p expression level and clinical pathological characteristics in 245 patients with prostate adenocarcinoma.**

| Parameters              | Number of cases | PLPP4 IHC expression |      | P values |
|-------------------------|-----------------|----------------------|------|----------|
|                         |                 | Low                  | High |          |
| <b>Histologic</b>       |                 |                      |      |          |
| Acinar Type             | 241             | 119                  | 122  | 0.370    |
| Other                   | 4               | 3                    | 1    |          |
| <b>Age</b>              |                 |                      |      |          |
| <62                     | 122             | 54                   | 68   | 0.085    |
| ≥62                     | 123             | 68                   | 55   |          |
| <b>T classification</b> |                 |                      |      |          |
| T1 – T2                 | 80              | 18                   | 62   | <0.001*  |
| T3 – T4                 | 165             | 104                  | 61   |          |
| <b>N classification</b> |                 |                      |      |          |
| N0                      | 190             | 77                   | 113  | <0.001*  |
| N1                      | 55              | 45                   | 10   |          |
| <b>M classification</b> |                 |                      |      |          |
| M0                      | 221             | 99                   | 122  | <0.001*  |
| M1                      | 24              | 23                   | 1    |          |
| <b>Gleason score</b>    |                 |                      |      |          |
| ≤7                      | 126             | 36                   | 90   | <0.001*  |
| >7                      | 119             | 86                   | 33   |          |
| <b>ISUP Grade</b>       |                 |                      |      |          |
| ≤3                      | 126             | 36                   | 90   | <0.001*  |
| >3                      | 119             | 86                   | 33   |          |
| <b>PSA level</b>        |                 |                      |      |          |
| ≤20 ng/ml               | 169             | 74                   | 95   | 0.005*   |
| >20 ng/ml               | 76              | 48                   | 28   |          |

Bone scan or CT or

MRI results

|                 |     |    |     |         |
|-----------------|-----|----|-----|---------|
| Normal          | 201 | 96 | 105 | <0.001* |
| Bone metastasis | 13  | 13 | 0   |         |

---

\* ISUP: International Society of Urological Pathology, N/A: Not available, PSA:

Prostate-specific antigen.
