# Supplementary material for: Downregulation of miR-133a-3p promotes prostate cancer bone metastasis via activating PI3K/AKT signaling
Source: Springer Nature journal article supplement (doi:10.1186/s13046-018-0813-4), 2018-07-18
Supplement: MOESM7 [file 15961994]

**Table S7. Univariate and multivariate analysis of factors associated with overall survival in 245 patients with prostate adenocarcinoma.**

| Characteristics          | Univariate analysis    |                 | Multivariate analysis  |                 |
|--------------------------|------------------------|-----------------|------------------------|-----------------|
|                          | HR (95% CI)            | <i>P</i> values | HR (95% CI)            | <i>P</i> values |
| Age<br>(> 62)            | 19.18<br>(2.54-144.76) | 0.004*          | 22.57<br>(2.92-174.22) | 0.003*          |
| T classification         | 1.84<br>(0.67-5.07)    | 0.240           | 1.86<br>(0.64-5.39)    | 0.254           |
| N classification         | 0.78<br>(0.23-2.72)    | 0.700           | 0.80<br>(0.19-3.44)    | 0.769           |
| M classification         | 4.28<br>(1.51-12.15)   | 0.006*          | 7.83<br>(2.25-27.27)   | 0.001*          |
| Gleason score            | 1.12<br>(0.69-1.81)    | 0.639           | 1.01<br>(0.16-6.47)    | 0.991           |
| ISUP Grade               | 1.10<br>(0.77-1.57)    | 0.600           | 0.79<br>(0.20-3.15)    | 0.741           |
| PSA level<br>(>20 ng/ml) | 0.68<br>(0.22-2.09)    | 0.503           | 0.74<br>(0.22-2.45)    | 0.617           |
| miR-133a-3p<br>level     | 1.07<br>(0.41-2.78)    | 0.886           | 1.68<br>(0.45-6.25)    | 0.441           |

\* ISUP: International Society of Urological Pathology, HR: hazard ratio, CI: confidence interval, PSA: Prostate-specific antigen.
