# Supplementary material for: Downregulation of miR-133a-3p promotes prostate cancer bone metastasis via activating PI3K/AKT signaling
Source: Springer Nature journal article supplement (doi:10.1186/s13046-018-0813-4), 2018-07-18
Supplement: MOESM8 [file 15961994]

**Table S8. Univariate and multivariate analysis of factors associated with bone metastasis free survival in 223 patients with prostate adenocarcinoma.**

| Characteristics          | Univariate analysis |                 | Multivariate analysis |                 |
|--------------------------|---------------------|-----------------|-----------------------|-----------------|
|                          | HR (95% CI)         | <i>P</i> values | HR (95% CI)           | <i>P</i> values |
| Age<br>(>62)             | 1.38<br>(0.84-2.26) | 0.206           | 1.24<br>(0.73-2.09)   | 0.427           |
| T classification         | 3.08<br>(1.18-5.33) | <0.001*         | 1.37<br>(0.68-2.78)   | 0.382           |
| N classification         | 3.52<br>(2.14-5.77) | <0.001*         | 1.91<br>(1.09-3.35)   | 0.024*          |
| Gleason score            | 1.95<br>(1.49-2.55) | <0.001*         | 0.49<br>(0.18-1.36)   | 0.171           |
| ISUP Grade               | 1.78<br>(1.43-2.22) | <0.001*         | 2.18<br>(0.91-5.21)   | 0.080           |
| PSA level<br>(>20 ng/ml) | 1.46<br>(0.88-2.43) | 0.141           | 1.20<br>(0.71-2.01)   | 0.503           |
| miR-133a-3p level        | 0.19<br>(0.11-0.36) | <0.001*         | 0.37<br>(0.19-0.74)   | 0.005*          |

\* ISUP: International Society of Urological Pathology, HR: hazard ratio, CI: confidence interval, PSA: Prostate-specific antigen.
