# Supplementary material for: Downregulation of miR-133a-3p promotes prostate cancer bone metastasis via activating PI3K/AKT signaling
Source: Springer Nature journal article supplement (doi:10.1186/s13046-018-0813-4), 2018-07-18

**Supplemental Figure 2**

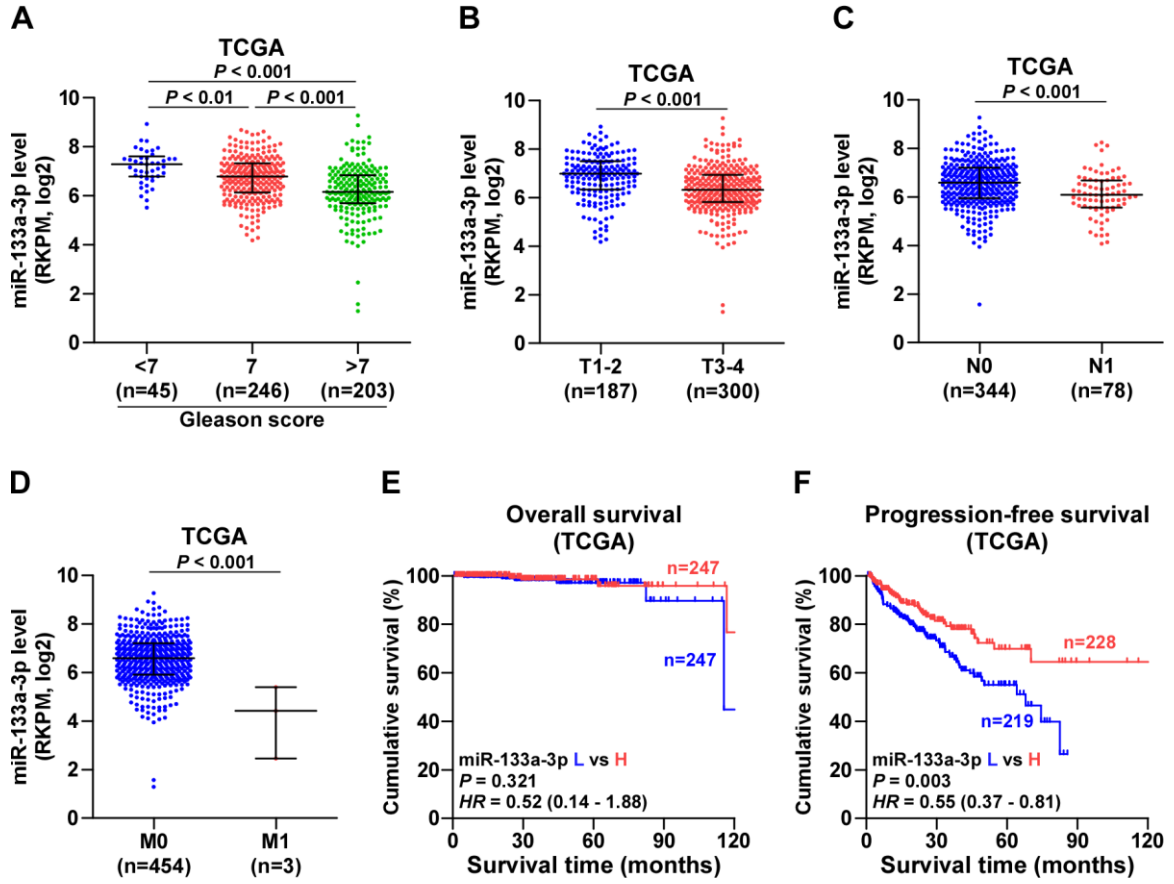

Supplement: MOESM10 [file 15961994]
